# Supplementary material for: The complete mitochondrial genome of Solemya velum (Mollusca: Bivalvia) and its relationships with Conchifera
Source: PubMed Central journal article supplement (PMC3704766; doi:10.1186/1471-2164-14-409), 2013-06-18
Supplement: 1471-2164-14-409-S4.pdf [file 1471-2164-14-409-S4.pdf]

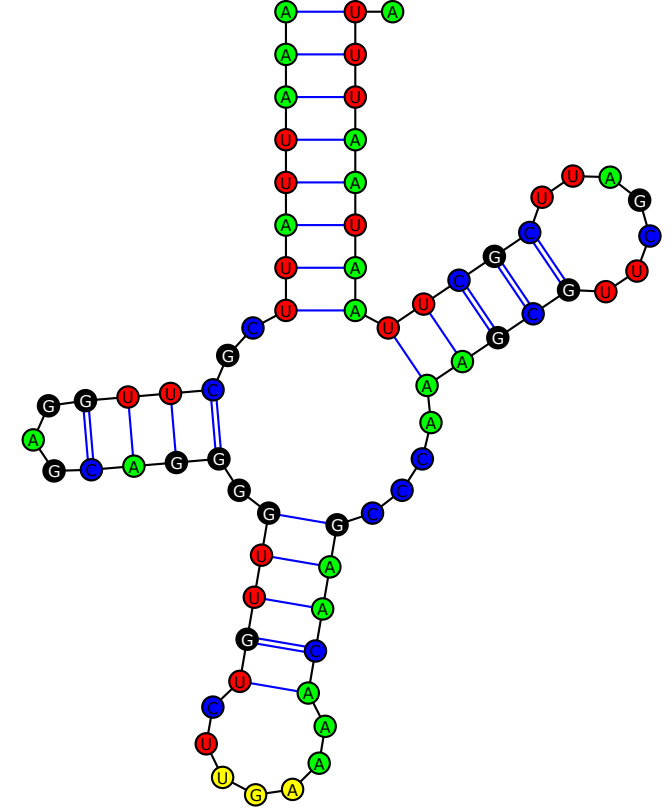

tRNA-Ser2(UGA)

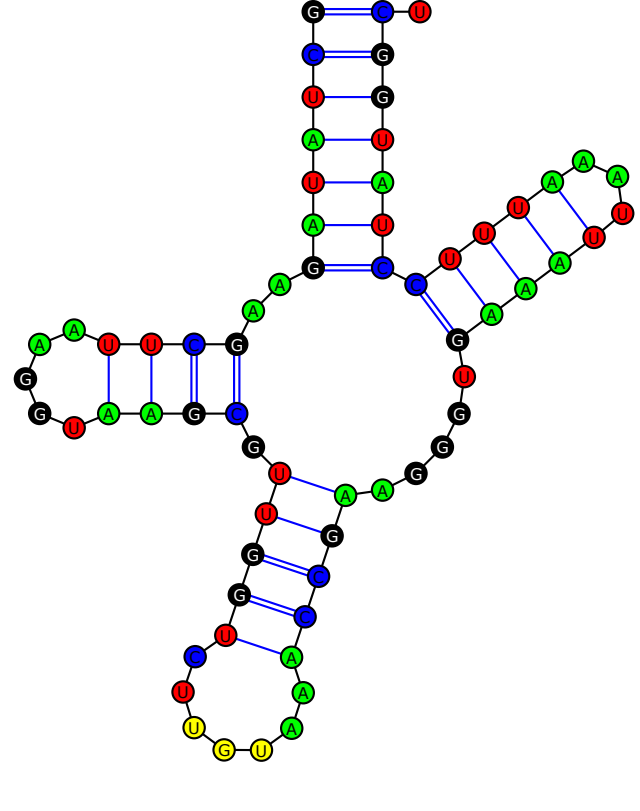

tRNA-Thr(UGU)

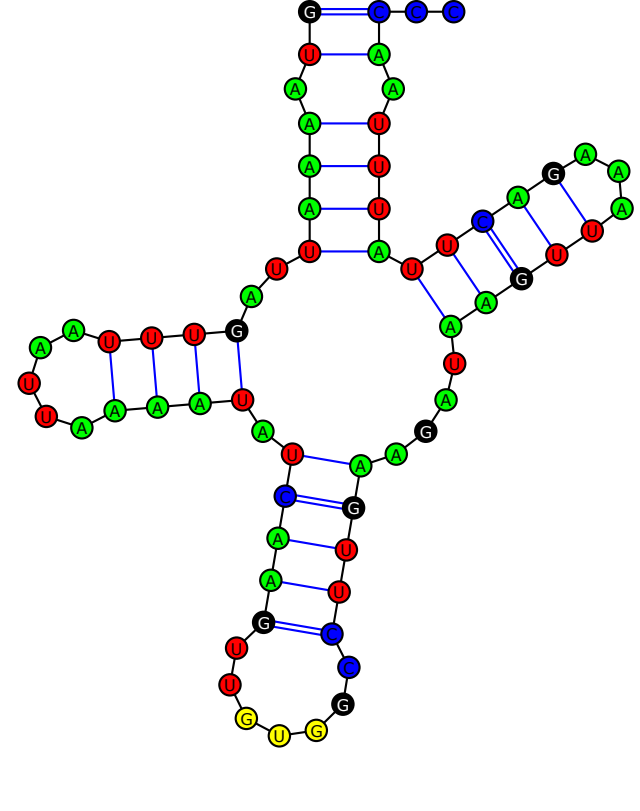

tRNA-His(GUG)

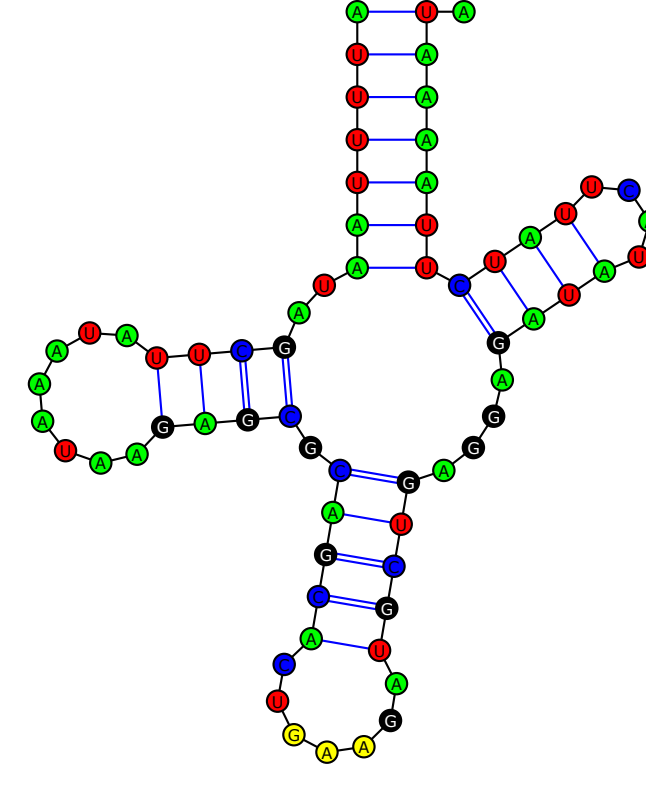

tRNA-Phe(GAA)

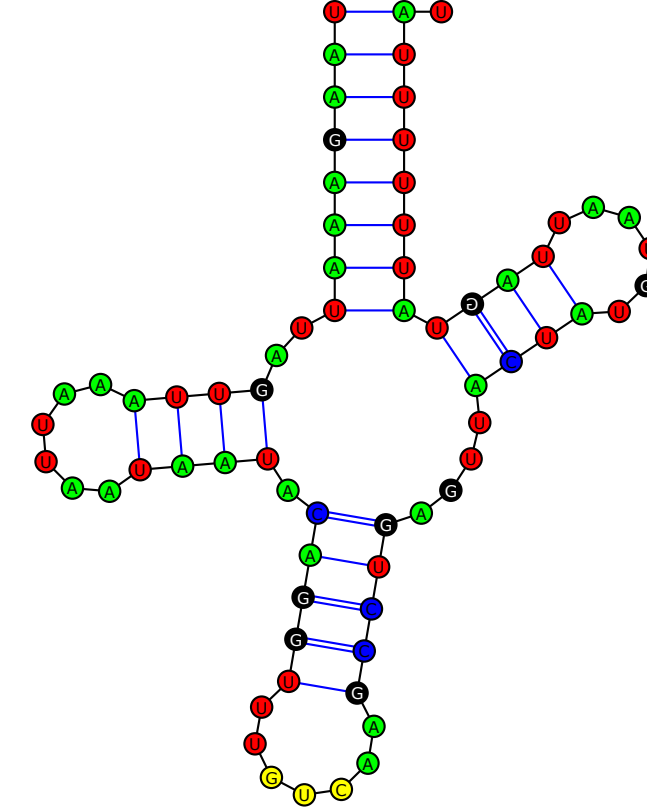

tRNA-Asp(GUC)

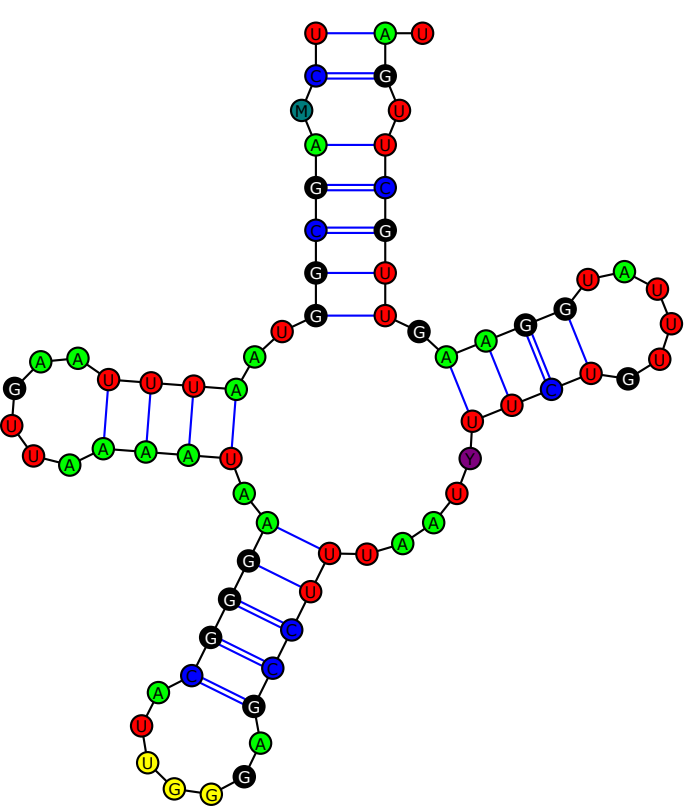

tRNA-Pro(UGG)

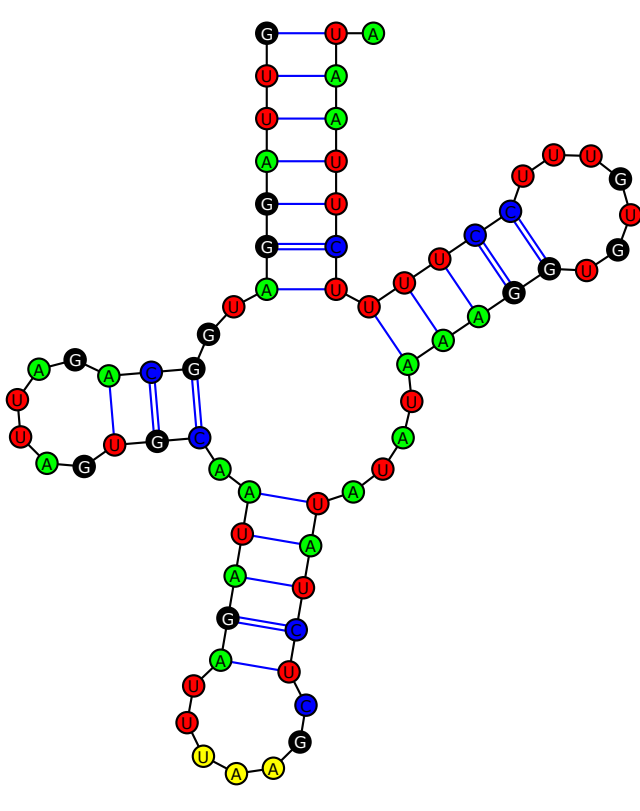

tRNA-Leu2(UAA)

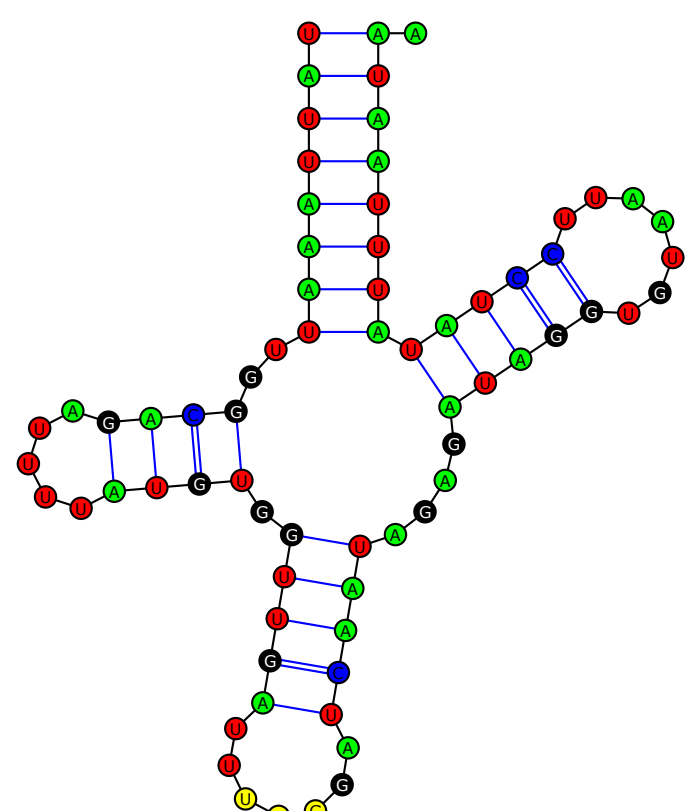

tRNA-Leu1(UAG)

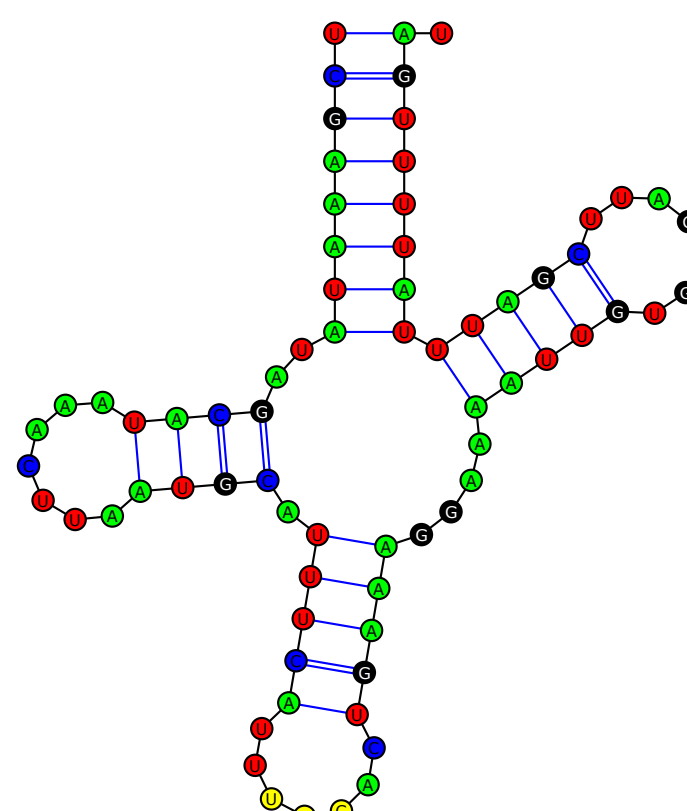

tRNA-Val(UAC)

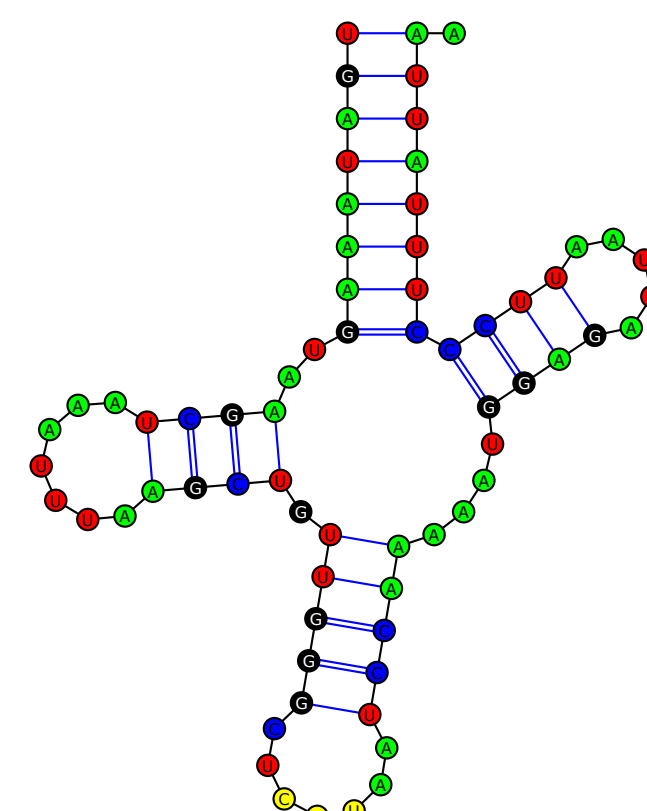

tRNA-Met(CAU)

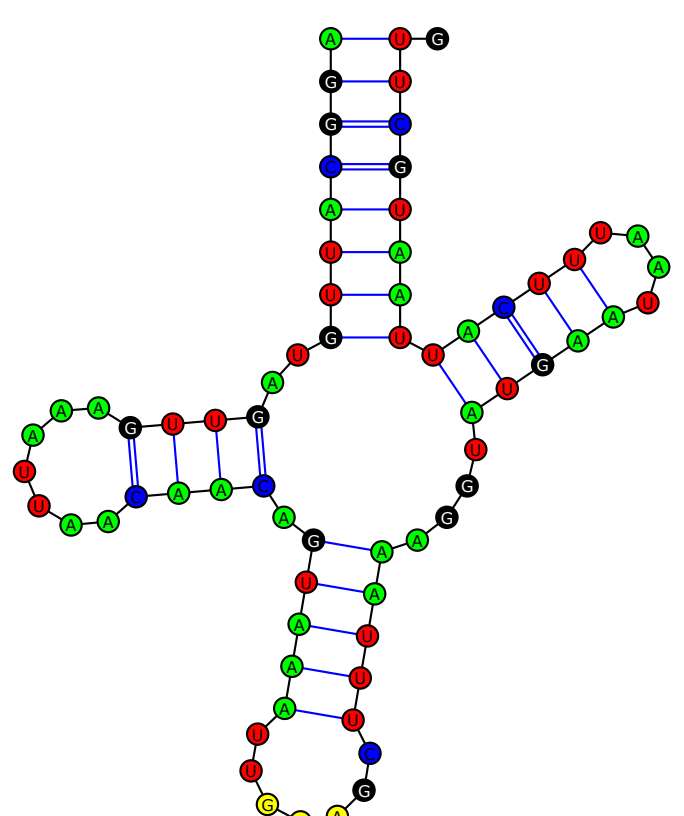

tRNA-Cys(GCA)

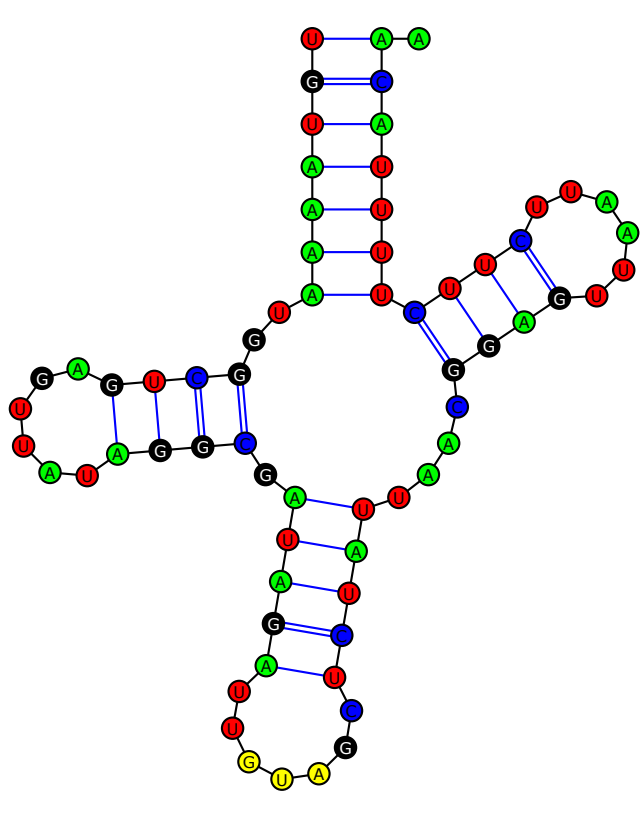

tRNA-Tyr(GUA)

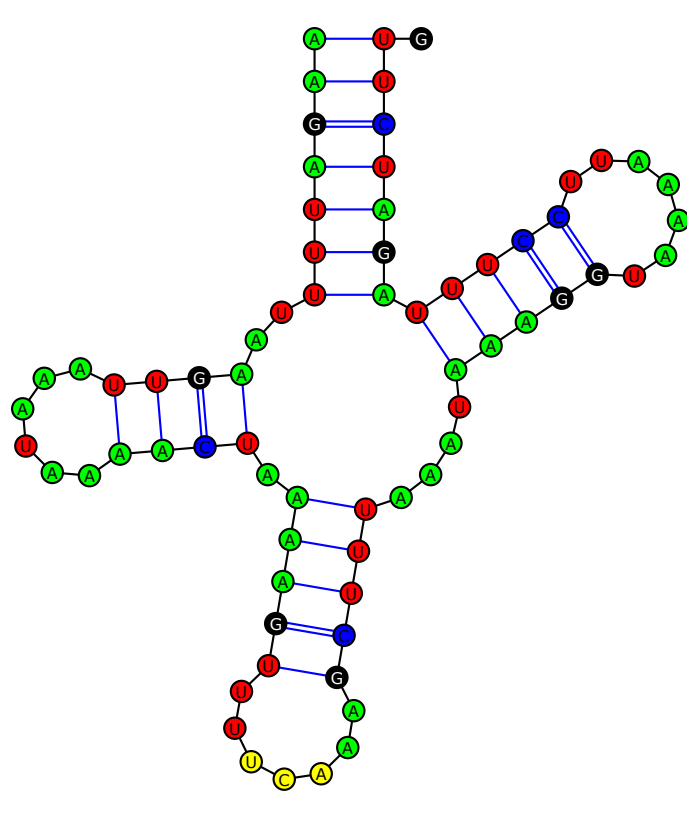

tRNA-Trp(UCA)

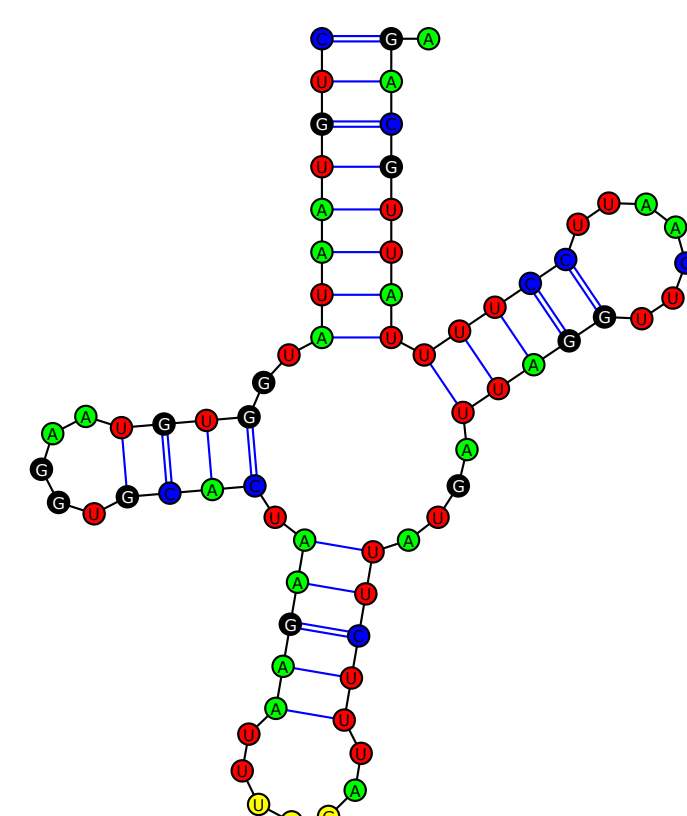

tRNA-Gln(UUG)

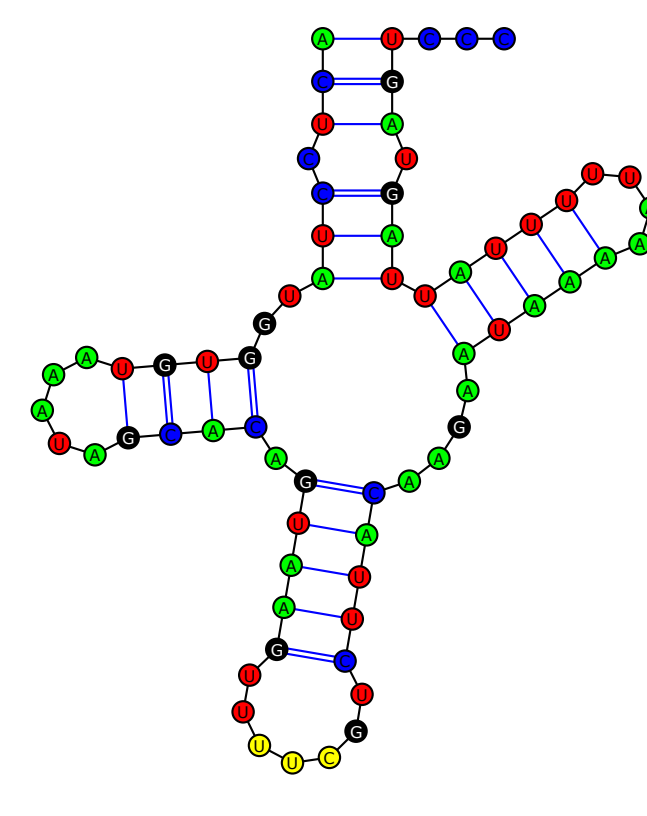

tRNA-Glu(UUC)

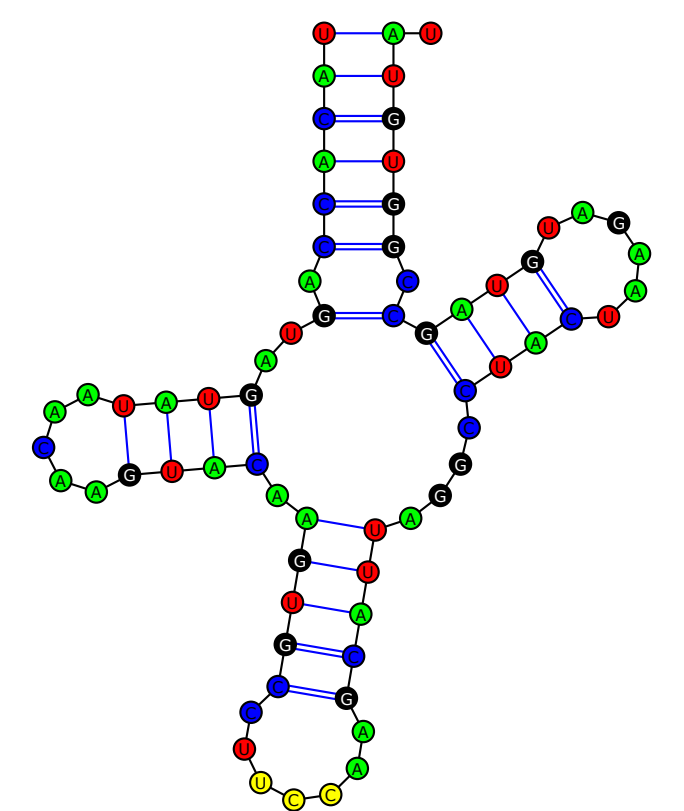

tRNA-Gly(UCC)

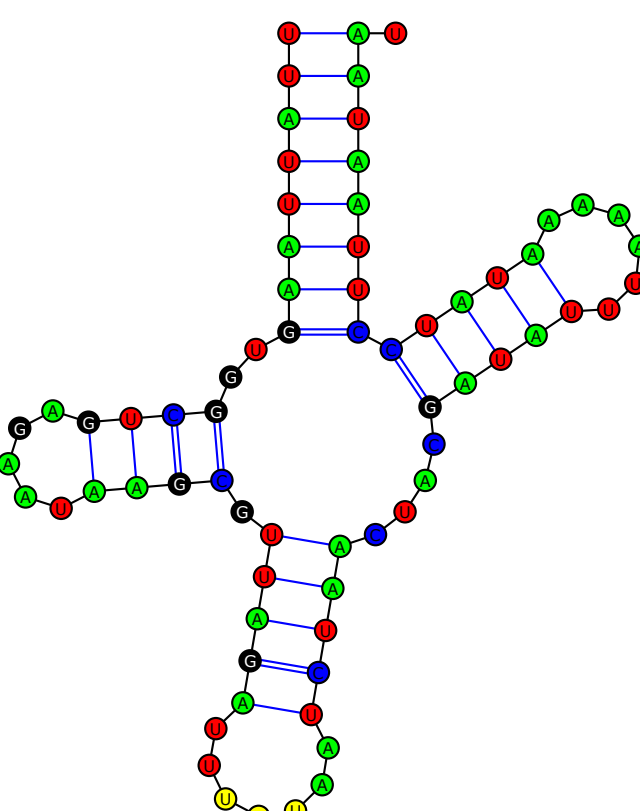

tRNA-Lys(UUU)

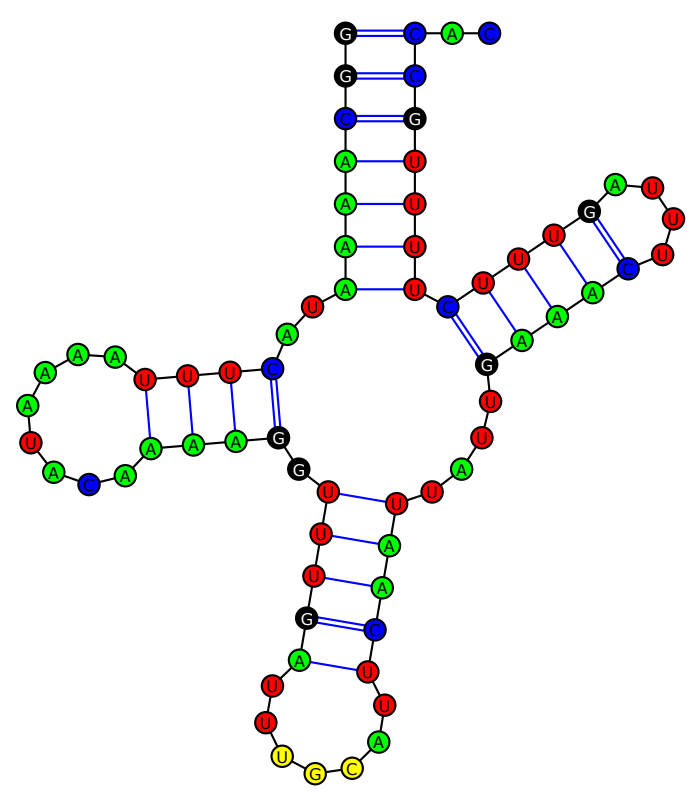

tRNA-Ala(UGC)

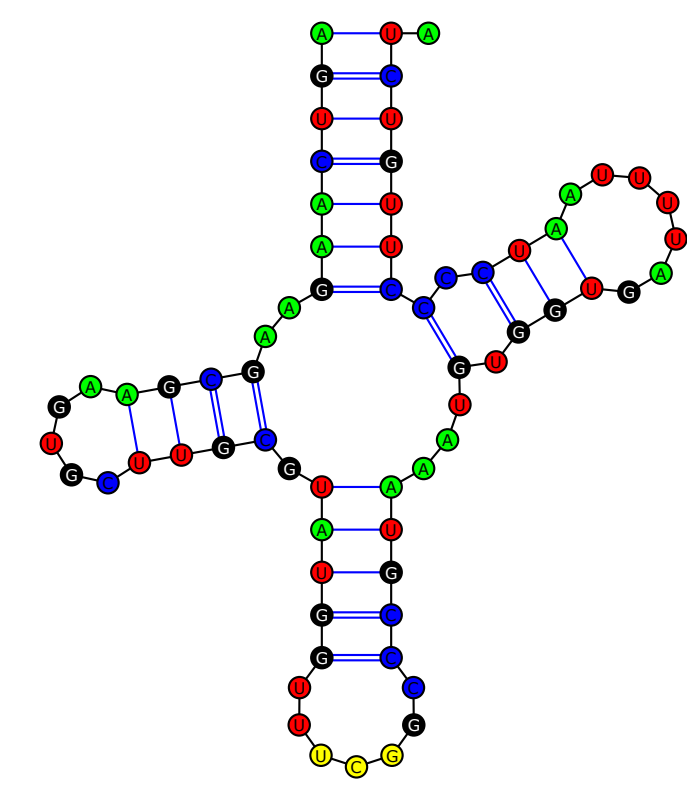

tRNA-Arg(UCG)

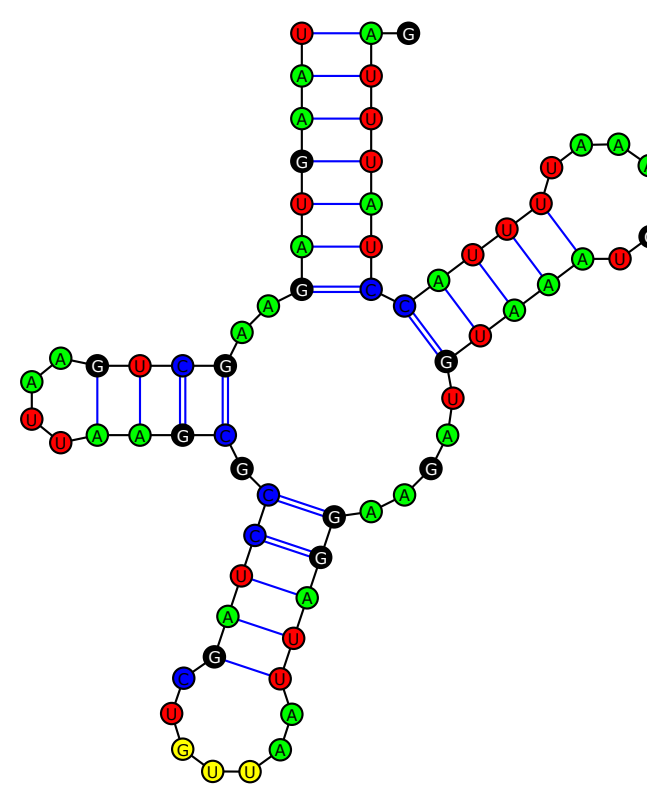

tRNA-Asn(GUU)

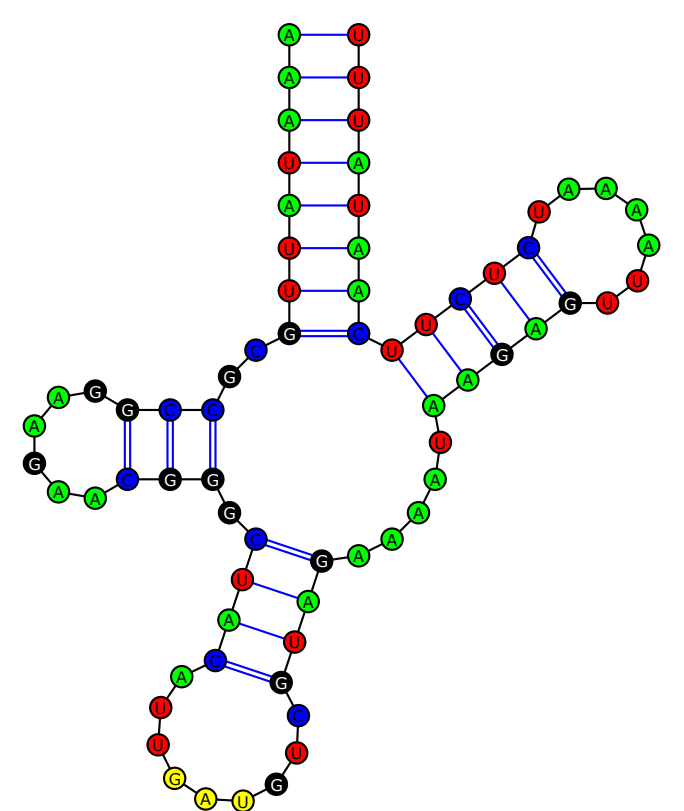

tRNA-Ile(GAU)

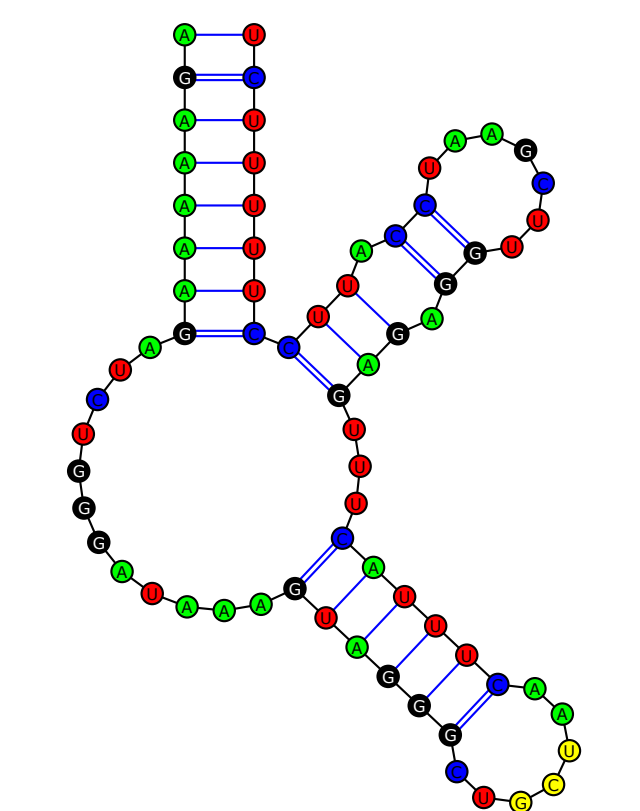

tRNA-Ser1(GCU)
