# Supplementary material for: The complete mitochondrial genome of Solemya velum (Mollusca: Bivalvia) and its relationships with Conchifera
Source: PubMed Central journal article supplement (PMC3704766; doi:10.1186/1471-2164-14-409), 2013-06-18

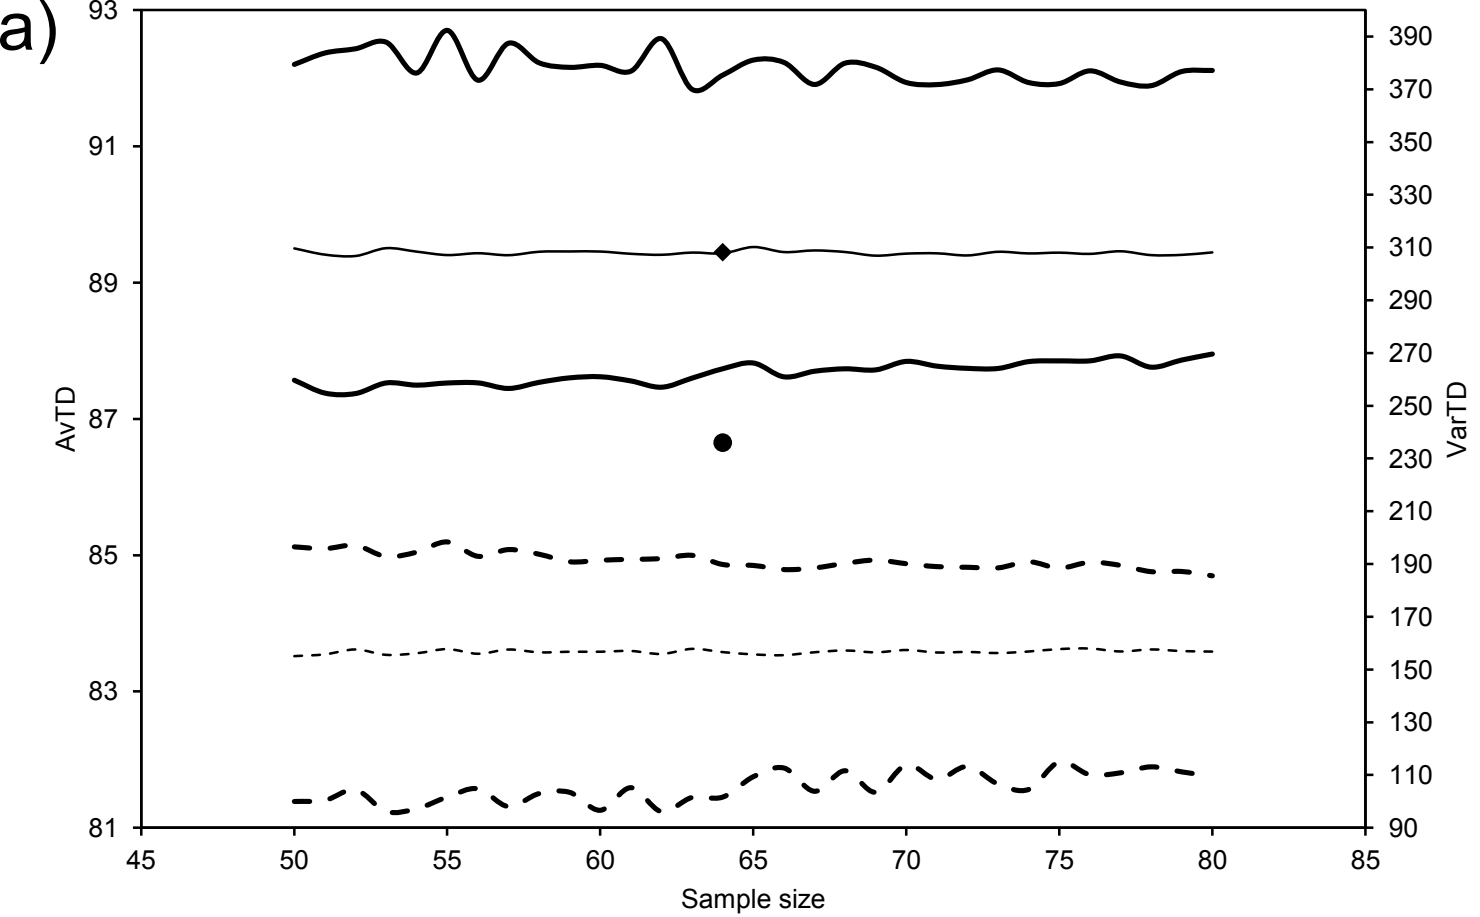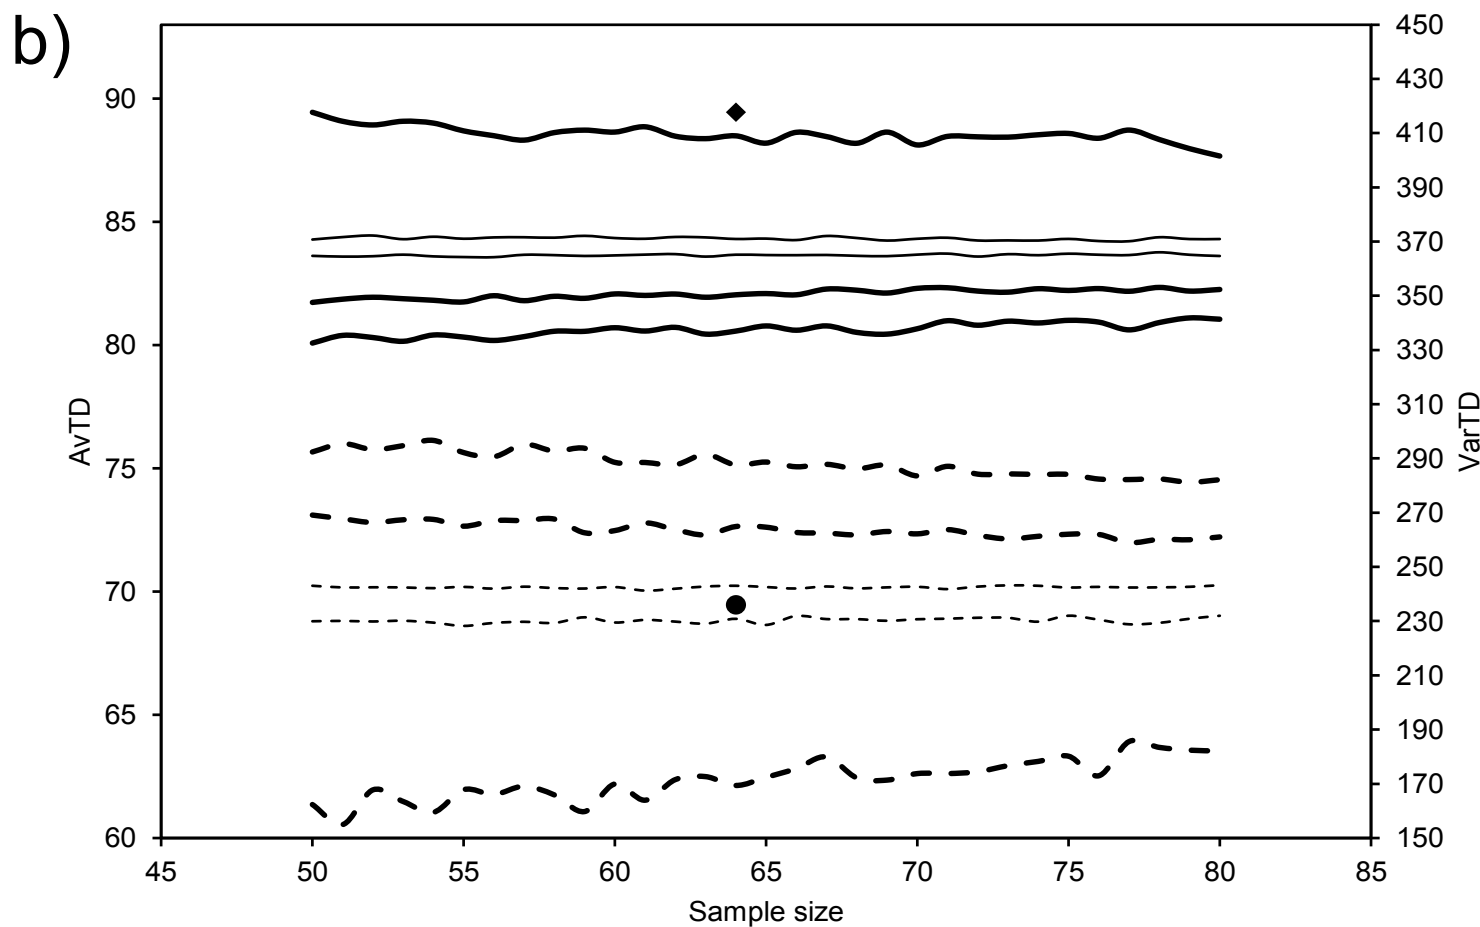

Supplement: 1471-2164-14-409-S10.pdf [file 1471-2164-14-409-S10.pdf]
